# Supplementary material for: Tunable amplified spontaneous emission based on liquid magnetically responsive photonic crystals
Source: Royal Society of Chemistry journal article supplement (doi:10.1039/c8tc05763j), 2019-01-01
Supplement: c8tc05763j2.pdf [file c8tc05763j2.pdf]

Electronic Supplementary Material (ESI) for Journal of Materials Chemistry C.  
**This journal is © The Royal Society of Chemistry 2017**

## Supporting Information

# Tunable amplified spontaneous emission based on liquid magnetically responsive photonic crystals

*Ying Li, Yue Long, Guoqiang Yang, Chen-Ho Tung, and Kai Song*

### Experimental Section

#### Materials.

All the chemicals used in this work were of analytical grade and were used as received without further purification. Ferric chloride ( $\text{FeCl}_3$ , anhydrous), sodium acetate ( $\text{CH}_3\text{COONa}$ , NaAc, anhydrous), poly(vinyl pyrrolidone) (PVP,  $M_w=1\ 300\ 000$ ) were purchased from Sigma-Aldrich. Polyethyleneglycol (PEG,  $M_w=2\ 000$ ) and Rhodamin B (RhB) were purchased from Alfa Aesar. Diethylene glycol (DEG) and ethylene glycol (EG) were purchased from Sinopharm chemical reagent Beijing Co., Ltd. Water used throughout all experiments was purified with the Millipore system.

#### Preparation of $\text{Fe}_3\text{O}_4$ @PVP particles.

In a typical procedure, PEG (10 mmol),  $\text{H}_2\text{O}$  (1.1 mL) and  $\text{FeCl}_3$  (5 mmol) were first added into EG (15 mL) and mixed for 30 min to form a transparent light yellow solution A. NaAc (12 mmol) was added into DEG (20 ml) by mixing for 30 min to form a colorless and transparent solution B. Then, solution B was added into solution A to form solution C under vigorous stirring. This solution was subsequently heated at  $75\ ^\circ\text{C}$  with vigorous stirring for 90 min. Afterwards, the resulting solution was transferred into a 50 mL Teflon-lined stainless-steel autoclave. The autoclave was then sealed and maintained at  $200\ ^\circ\text{C}$  for 5 h. After being cooled to room temperature, the final product was collected by a magnet and rinsed with a mixture of ethanol and deionized (DI) water several times before being dispersed in ethanol. PVP (3 g) was dissolved in 60 mL  $\text{H}_2\text{O}$ . The prepared solution was charged into a suspension containing 1 mg  $\text{Fe}_3\text{O}_4$  particles and stirred for 18 h. The resultant  $\text{Fe}_3\text{O}_4$ @PVP particles were then centrifuged and washed with a mixture of ethanol and deionized (DI) water and then dispersed in ethanol for the fabrication of liquid magnetically responsive photonic crystals.

#### Characterization techniques.

Scanning electron microscope (SEM) images were obtained by JEOL S-4800 field emission scanning electron microscope. Transmission electron microscope (TEM) images were taken on JEOL JEM-2100F

transmission electron microscope. X-ray diffraction (XRD) analysis was carried out on a D/Max 2500V/PC X-ray diffractometer ( $\lambda=1.54056 \text{ \AA}$ ) in the  $2\theta$  range of  $10\text{-}70^\circ$  using Cu-K $\alpha$  radiation. The Fourier transform IR (FTIR) spectrum was obtained using a 60-SXB FTIR spectrometer in the range of  $400\text{-}4000 \text{ cm}^{-1}$  with a resolution of  $4 \text{ cm}^{-1}$ . The magnetic properties of the samples were investigated using a physical property measurement system (PPMS) (Model PPMS-9, Quantum Design, USA) with applied magnetic fields between  $-8$  and  $8 \text{ kOe}$  at  $300 \text{ K}$ . The absorption spectrum was collected using a Shimadzu UV-3600 Plus spectrometer. The PL spectrum was obtained using a Hitachi F-4500 fluorescence spectrometer. Optical Bragg diffractions were tested by a fiber spectrometer (AvaSpec-2048, Avantes). These spectra were taken with light impinging perpendicular to the quartz cell containing sample. The diameter of collection spot was approximately  $2 \text{ mm}$ . The color of the sample was recorded using a common digital camera. Photo-pumped ASE studies were carried out using an excitation beam produced by a pulsed Nd:YAG laser at  $532 \text{ nm}$  with a pulse duration of  $7 \text{ ns}$  and pulse rate of  $10 \text{ Hz}$ . The excitation beam was focused on the sample by a lens with a focal length of  $150 \text{ mm}$  to a spot with a diameter of  $4 \text{ mm}$  and the incident beam was along the normal direction of the quartz cell containing sample. The optical emission was tested by a fiber spectrometer (AvaSpec-2048, Avantes). These spectra were taken with light impinging perpendicular to the quartz cell containing sample. The integration time was  $100 \text{ ms}$ .

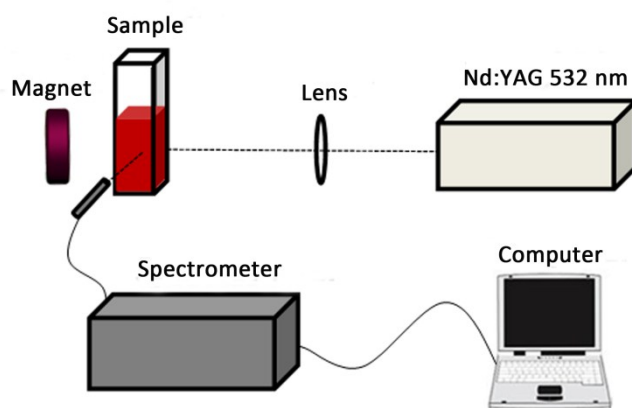

**Scheme S1.** Experimental setup for the measurement of tunable ASE.

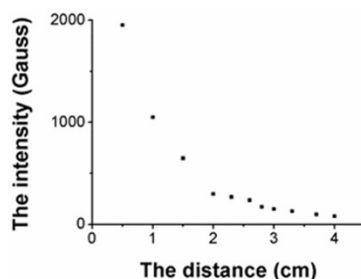

**Fig. S1.** Change of the magnetic field intensity as a function of the magnet-sample distance.

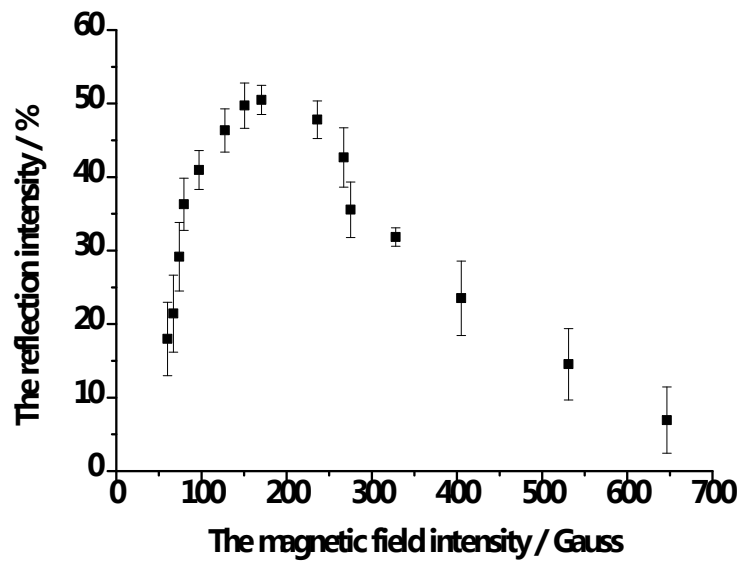

Fig. S2. The relationship between the reflection intensity and the magnetic field intensity.

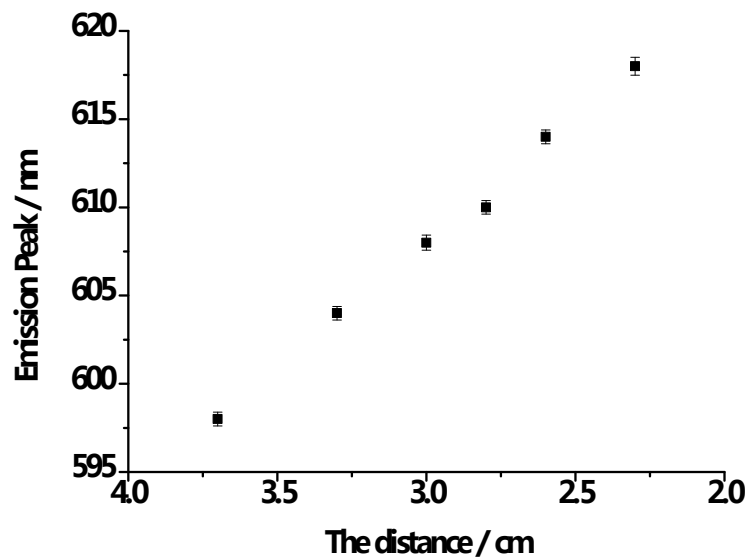

Fig. S3. ASE peaks corresponding to the decreasing distances between the magnet and the sample to achieve tunable ASE.

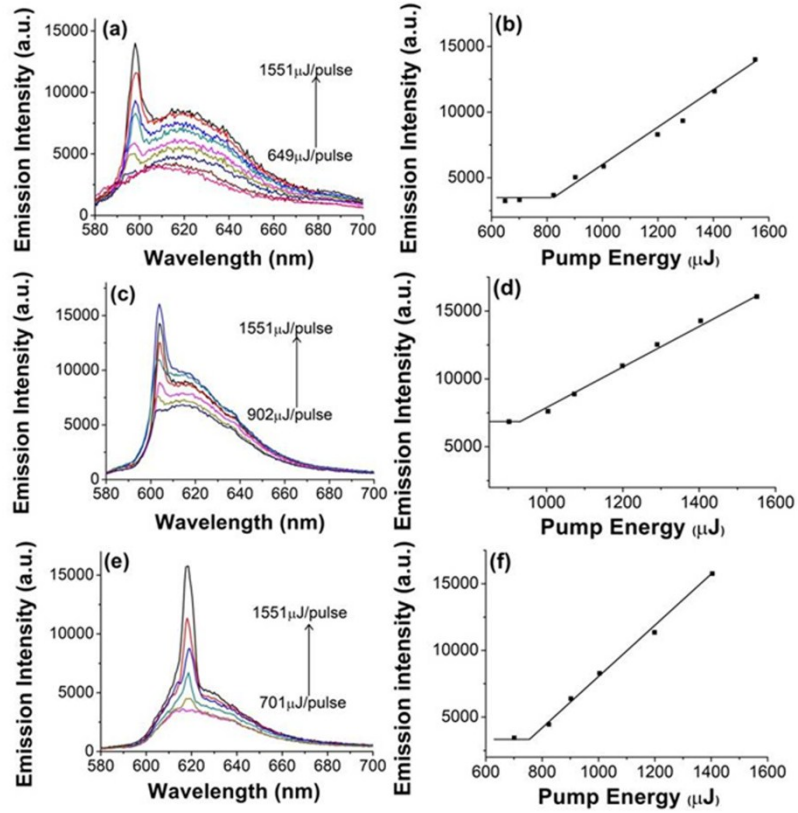

**Fig. S4.** The ASE spectra and the ASE intensities as functions of excitation intensity. (a), (c), (e) Shows the ASE spectra dependence on excitation intensity, under a pulsed laser excitation (Nd:YAG laser at 532 nm with 7 ns pulse duration). (b), (d), (f) shows the ASE intensities dependence on excitation intensity corresponding to (a), (c), (e). The position of ASE spectra is 598, 604 and 618 nm for (a), (c) and (e), respectively. The threshold excitation intensity is 845, 932, and 755  $\mu\text{J}/\text{pulse}$  for (b), (d), (f), respectively.

**Movie S1:** Structural color change of the liquid MRPCs when decreasing the magnet-sample distance.
